# Supplementary material for: Low hygroscopicity of organic material in anthropogenic aerosols under pollutionepisode in China
Source: Copernicus journal article supplement (doi:10.5194/acp-2018-77), 2018-02-15
Supplement: Supplementary file 1 [file acp-2018-77-supplement.pdf]

Supplement:

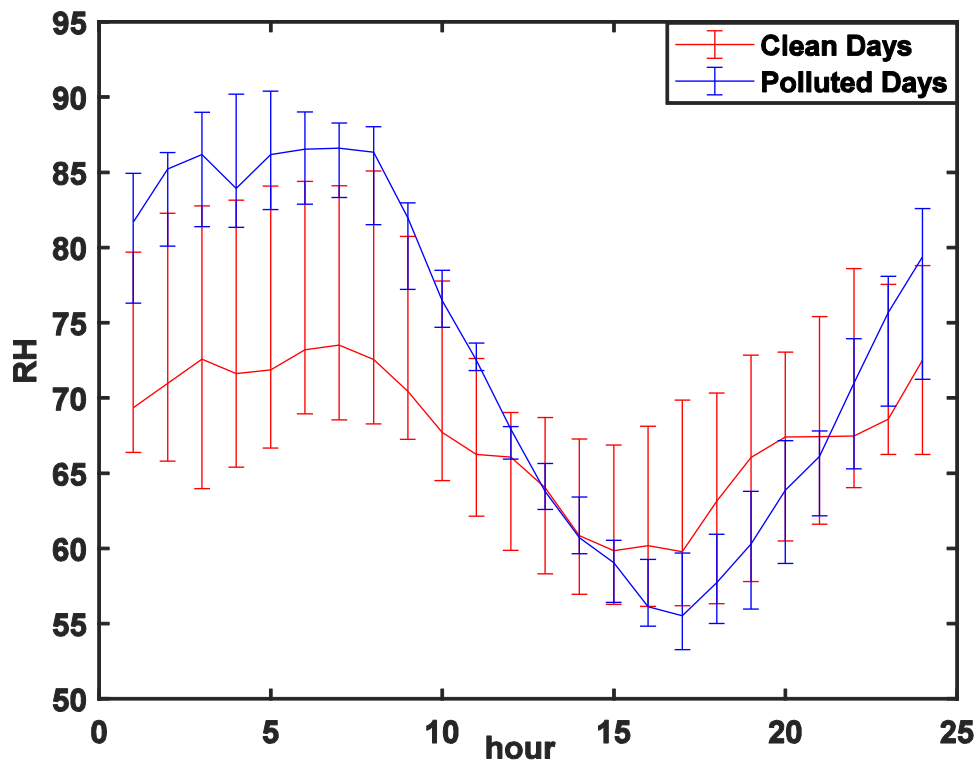

Figure S1: Diurnal variation of relative humidity during the polluted and the clean days.

5

10

15

20

25

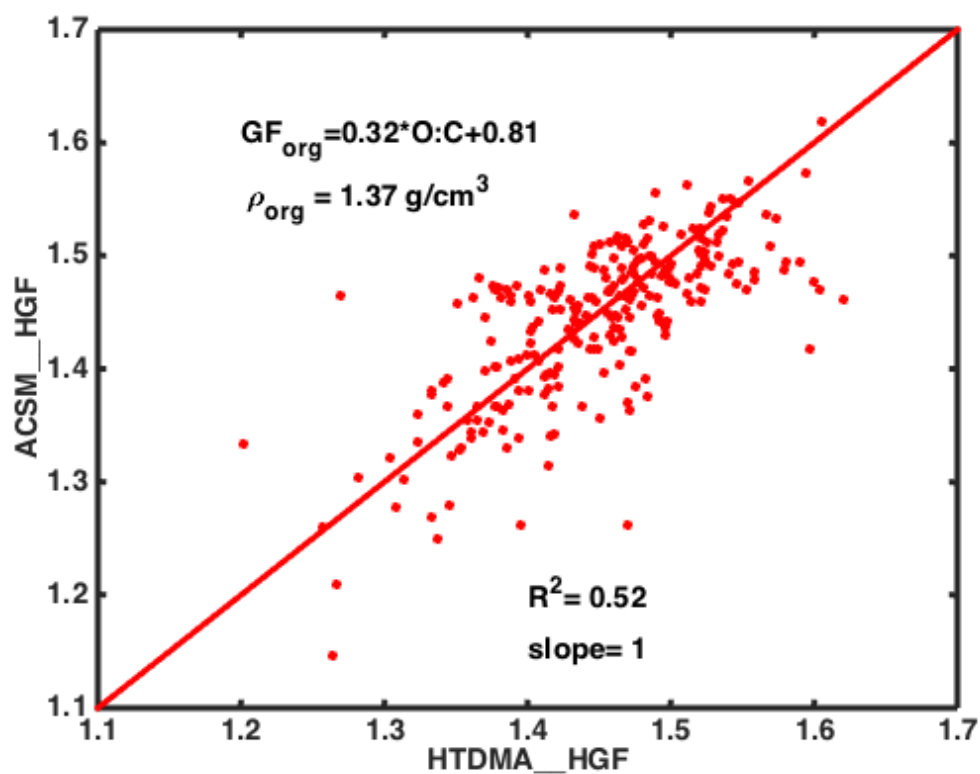

30 Figure S2. Closure analysis with the best fitting between the measured HGFs and the ACSM-derived ones using the O:C-dependent  $HGF_{\text{org}}$  and the effective density of organic aerosol fraction. The equations are the achieved approximation for  $HGF_{\text{org}}$  as a function of the O:C of organics and the effective density for organics, respectively.
